# Supplementary material for: 9,10-Phenanthrenesemiquinone radical complexes of ruthenium(iii), osmium(iii) and rhodium(iii) and redox series
Source: Royal Society of Chemistry journal article supplement (doi:10.1039/c3dt00038a), 2013-01-01
Supplement: c3dt00038a.pdf [file c3dt00038a.pdf]

## Electronic Supplementary Information

# 9,10-Phenanthrenesemiquinone radical complexes of ruthenium(III), osmium(III) and rhodium(III) and redox series

Manas Kumar Biswas,<sup>a</sup> Sarat Chandra Patra,<sup>a</sup> Amarendra Nath Maity,<sup>b</sup> Shyue-Chu Ke,<sup>b</sup> Thomas Weyhermüller<sup>c</sup> and Prasanta Ghosh<sup>\*a</sup>

<sup>a</sup>Department of Chemistry, R. K. Mission Residential College, Narendrapur, Kolkata-103, India.

<sup>b</sup>Department of Physics, National Dong Hwa University, Shou-Feng, Hualien 97401, Taiwan.

<sup>c</sup>Max-Planck Institute for Chemical Energy Conversion, 45470 Muelheim an der Ruhr, Germany

## Table of Contents

|                                                                                                                                                  | Page |
|--------------------------------------------------------------------------------------------------------------------------------------------------|------|
| X band EPR spectral parameters of 3 and 1 <sup>-</sup> complexes                                                                                 | 2    |
| Redox potentials of 1-3 complexes in CH <sub>2</sub> Cl <sub>2</sub> solution (0.20 M [N( <i>n</i> -Bu) <sub>4</sub> ]PF <sub>6</sub> ) at 298 K | 2    |
| Gas phase optimized geometries of 1 and 2 (at the RB3LYP level of the theory)                                                                    | 2    |
| Optimized coordinates                                                                                                                            | 3-9  |

**Table S1** X band EPR spectral parameters of **3** and **1<sup>+</sup>** complexes

| complexes            | conditions                                                                                                      | $g_{iso}/g_{av}$ | $g_1$ | $g_2$ | $g_3$ | $^a\Delta g$ | $^b$ linewidth/G                                                                                                                           |
|----------------------|-----------------------------------------------------------------------------------------------------------------|------------------|-------|-------|-------|--------------|--------------------------------------------------------------------------------------------------------------------------------------------|
| <b>3</b>             | Solid (83 K)                                                                                                    | 1.999            | 2.005 | 2.005 | 1.987 | 0.018        | 6.5, 6.0                                                                                                                                   |
|                      | CH <sub>2</sub> Cl <sub>2</sub> solution (298 K)                                                                | 1.998            |       |       |       |              | 1.5<br>A( <sup>31</sup> P)-9.5<br>A( <sup>103</sup> Rh)-1.7<br>A( <sup>35,37</sup> Cl)-1.4                                                 |
|                      | CH <sub>2</sub> Cl <sub>2</sub> frozen glass (83 K)                                                             | 1.999            | 2.005 | 2.005 | 1.987 | 0.018        | 6.4, 5.8<br>A <sub>11</sub> ( <sup>31</sup> P)-10.0<br>A <sub>22</sub> ( <sup>31</sup> P)-10.0<br>A <sub>33</sub> ( <sup>31</sup> P)-11.57 |
| <b>1<sup>+</sup></b> | CH <sub>2</sub> Cl <sub>2</sub> frozen glass (83 K)                                                             |                  |       |       |       |              |                                                                                                                                            |
|                      | <i>trans</i> -[Ru <sup>III</sup> (PQ <sup>2-</sup> )(PPh <sub>3</sub> ) <sub>2</sub> X <sub>2</sub> ] component | 2.298            | 2.456 | 2.456 | 1.983 |              | 65.0, 9.0                                                                                                                                  |
|                      | <i>trans</i> -[Ru <sup>II</sup> (PQ <sup>-</sup> )(PPh <sub>3</sub> ) <sub>2</sub> X <sub>2</sub> ] component   | 1.999            | 2.004 | 2.004 | 1.991 |              | 20.0, 7.0                                                                                                                                  |

<sup>a</sup> $\Delta g = g_{max} - g_{min}$ . <sup>b</sup>linewidth = linewidth is the peak-to-peak width of the spectrum. Line width values were obtained from the simulation of the spectra using the WINEPR SimFonia program.

**Table S2** Redox potentials of **1-3** complexes in CH<sub>2</sub>Cl<sub>2</sub> solution (0.20 M [N(*n*-Bu)<sub>4</sub>]PF<sub>6</sub>) at 298 K

| complexes | $E^1_{1/2}/V(\Delta E^a/mV)$        | $E^2_{1/2}/V(\Delta E^a/mV)$                 | $E^3_{1/2}/V(\Delta E^a/mV)$ |
|-----------|-------------------------------------|----------------------------------------------|------------------------------|
| <b>1</b>  | +0.22 (69)                          | -0.72 (89),                                  | -1.0(120)                    |
| <b>2</b>  | +0.22 (134)                         | -0.92 (142)                                  | -                            |
| <b>3</b>  | +0.16 (81), +0.16 (87) <sup>c</sup> | -0.92 <sup>b</sup> , -0.89 (88) <sup>c</sup> | -                            |

<sup>a</sup>peak-to-peak separation, <sup>b</sup>cathodic peak potential, <sup>c</sup>redox potentials in presence of 0.025 mM PPh<sub>3</sub> at 298 K

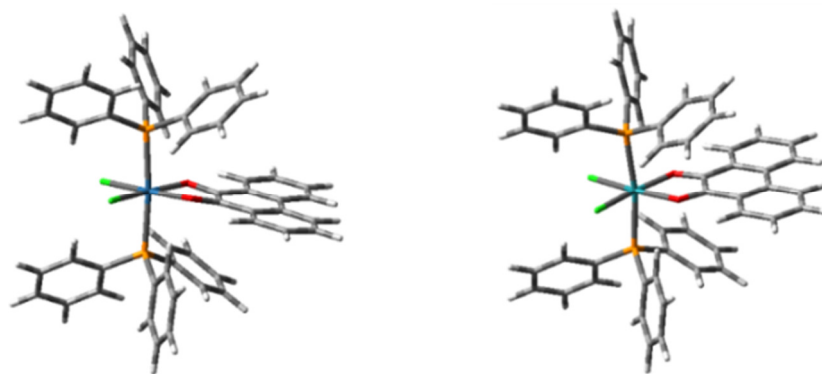

**Fig. S1** Gas phase optimized geometries of **1** and **2** (at the RB3LYP level of the theory).

## OPTIMIZED COORDINATES

**Table S3** Optimized coordinates of **1**

| S. No. | Symbol | X        | Y        | Z        | S. No. | Symbol | X        | Y        | Z        |
|--------|--------|----------|----------|----------|--------|--------|----------|----------|----------|
| 1      | Ru     | -6.4E-05 | -0.80723 | -0.00019 | 49     | C      | -4.81601 | -0.37902 | -3.92215 |
| 2      | P      | 2.461624 | -0.99449 | -0.05651 | 50     | C      | -5.48697 | -0.7793  | -2.76137 |
| 3      | P      | -2.46181 | -0.99416 | 0.056528 | 51     | C      | -4.77829 | -0.96758 | -1.57386 |
| 4      | Cl     | -0.04213 | -2.43756 | -1.81004 | 52     | C      | -3.19258 | -2.5608  | 0.703233 |
| 5      | Cl     | 0.041846 | -2.43833 | 1.808976 | 53     | C      | -4.26149 | -2.57374 | 1.612397 |
| 6      | O      | 0.095515 | 0.827325 | 1.27945  | 54     | C      | -4.82653 | -3.78572 | 2.022108 |
| 7      | O      | -0.09544 | 0.827247 | -1.27951 | 55     | C      | -4.3324  | -4.99365 | 1.524734 |
| 8      | C      | 0.061041 | 1.972765 | 0.723842 | 56     | C      | -3.26745 | -4.98474 | 0.618669 |
| 9      | C      | -0.06072 | 1.97274  | -0.72398 | 57     | C      | -2.69516 | -3.77879 | 0.211219 |
| 10     | C      | -0.14325 | 3.222671 | -1.45469 | 58     | H      | -0.3299  | 2.256804 | -3.36473 |
| 11     | C      | -0.28853 | 3.213902 | -2.85539 | 59     | H      | -0.48847 | 4.3942   | -4.64213 |
| 12     | C      | -0.37458 | 4.404666 | -3.56176 | 60     | H      | -0.37978 | 6.561666 | -3.40868 |
| 13     | C      | -0.31291 | 5.621811 | -2.86695 | 61     | H      | -0.12383 | 6.602016 | -0.98433 |
| 14     | C      | -0.16669 | 5.640101 | -1.48262 | 62     | H      | 0.124706 | 6.602073 | 0.983799 |
| 15     | C      | -0.07796 | 4.449399 | -0.73539 | 63     | H      | 0.380575 | 6.561893 | 3.408159 |
| 16     | C      | 0.078575 | 4.449443 | 0.735031 | 64     | H      | 0.488932 | 4.394516 | 4.641796 |
| 17     | C      | 0.167433 | 5.640193 | 1.482171 | 65     | H      | 0.330137 | 2.257034 | 3.364565 |
| 18     | C      | 0.313607 | 5.621999 | 2.866509 | 66     | H      | 2.171215 | -0.57257 | -2.90828 |
| 19     | C      | 0.375092 | 4.404907 | 3.561418 | 67     | H      | 2.927606 | 1.186778 | -4.47386 |
| 20     | C      | 0.288921 | 3.214095 | 2.855143 | 68     | H      | 4.246153 | 3.128838 | -3.63603 |
| 21     | C      | 0.143693 | 3.222765 | 1.454446 | 69     | H      | 4.815405 | 3.278615 | -1.21607 |
| 22     | C      | 3.111092 | 0.320719 | -1.17689 | 70     | H      | 4.107787 | 1.497465 | 0.339546 |
| 23     | C      | 2.770678 | 0.25677  | -2.54169 | 71     | H      | 1.648079 | -0.22739 | 2.683941 |
| 24     | C      | 3.186567 | 1.256889 | -3.42011 | 72     | H      | 2.902545 | 0.115924 | 4.788731 |
| 25     | C      | 3.927386 | 2.348379 | -2.94957 | 73     | H      | 5.364742 | -0.24437 | 4.851015 |
| 26     | C      | 4.247371 | 2.431939 | -1.59377 | 74     | H      | 6.55872  | -0.95822 | 2.78283  |
| 27     | C      | 3.842453 | 1.423328 | -0.71053 | 75     | H      | 5.309035 | -1.29854 | 0.686222 |
| 28     | C      | 3.389171 | -0.74952 | 1.526199 | 76     | H      | 4.65763  | -1.64448 | -2.01152 |
| 29     | C      | 2.722493 | -0.35879 | 2.69607  | 77     | H      | 5.651841 | -3.77934 | -2.73133 |
| 30     | C      | 3.434805 | -0.17486 | 3.886315 | 78     | H      | 4.769984 | -5.93539 | -1.84773 |
| 31     | C      | 4.814874 | -0.38208 | 3.923141 | 79     | H      | 2.868768 | -5.92053 | -0.23692 |
| 32     | C      | 5.485893 | -0.78287 | 2.762577 | 80     | H      | 1.856197 | -3.78131 | 0.476219 |
| 33     | C      | 4.777483 | -0.97041 | 1.574791 | 81     | H      | -4.10741 | 1.498588 | -0.3373  |
| 34     | C      | 3.19228  | -2.56079 | -0.70417 | 82     | H      | -4.81399 | 3.278833 | 1.219771 |
| 35     | C      | 4.261283 | -2.57327 | -1.61323 | 83     | H      | -4.24415 | 3.127133 | 3.639481 |
| 36     | C      | 4.826185 | -3.78506 | -2.0237  | 84     | H      | -2.9261  | 1.18398  | 4.475567 |
| 37     | C      | 4.331829 | -4.99325 | -1.52718 | 85     | H      | -2.17076 | -0.57451 | 2.908549 |
| 38     | C      | 3.266778 | -4.9848  | -0.62123 | 86     | H      | -1.64862 | -0.22727 | -2.6841  |
| 39     | C      | 2.694629 | -3.77903 | -0.21303 | 87     | H      | -2.90356 | 0.117334 | -4.7884  |
| 40     | C      | -3.11074 | 0.320356 | 1.178027 | 88     | H      | -5.3661  | -0.24075 | -4.84981 |
| 41     | C      | -3.84183 | 1.42357  | 0.712656 | 89     | H      | -6.55997 | -0.95366 | -2.78123 |
| 42     | C      | -4.24616 | 2.431688 | 1.59672  | 90     | H      | -5.3098  | -1.29529 | -0.68511 |
| 43     | C      | -3.92585 | 2.34705  | 2.952382 | 91     | H      | -4.65764 | -1.64516 | 2.011371 |
| 44     | C      | -3.18531 | 1.254947 | 3.421939 | 92     | H      | -5.6521  | -3.78035 | 2.729843 |
| 45     | C      | -2.77002 | 0.255301 | 2.542698 | 93     | H      | -4.77066 | -5.93594 | 1.84469  |
| 46     | C      | -3.38976 | -0.74794 | -1.52577 | 94     | H      | -2.86962 | -5.92028 | 0.233693 |
| 47     | C      | -2.72316 | -0.3577  | -2.69584 | 95     | H      | -1.8568  | -3.78073 | -0.47811 |
| 48     | C      | -3.43575 | -0.17305 | -3.88581 |        |        |          |          |          |

**Table S4** Optimized coordinates of close shell singlet solutions of  $\mathbf{I}_{Me}$

| S. No. | Symbol | X        | Y        | Z        | S. No. | Symbol | X        | Y        | Z        |
|--------|--------|----------|----------|----------|--------|--------|----------|----------|----------|
| 1      | Ru     | 0.007308 | 4.853641 | 4.363339 | 28     | H      | -1.26477 | 12.17469 | 7.59537  |
| 2      | P      | 2.261207 | 4.457531 | 5.142078 | 29     | C      | 2.731486 | 2.690517 | 5.299703 |
| 3      | Cl     | 0.63333  | 3.265539 | 2.59056  | 30     | H      | 3.766385 | 2.603272 | 5.650982 |
| 4      | P      | -2.24234 | 4.437117 | 3.582916 | 31     | H      | 2.050435 | 2.20666  | 6.004212 |
| 5      | O      | 0.443965 | 6.463705 | 3.167349 | 32     | H      | 2.620669 | 2.208063 | 4.325565 |
| 6      | C      | 0.244483 | 7.614303 | 3.699615 | 33     | C      | 2.629083 | 5.159453 | 6.808647 |
| 7      | C      | 0.503086 | 8.864622 | 3.014392 | 34     | H      | 2.521455 | 6.248746 | 6.793398 |
| 8      | C      | 1.004947 | 8.859796 | 1.697346 | 35     | H      | 1.907999 | 4.750647 | 7.522881 |
| 9      | C      | 1.256232 | 10.05341 | 1.037304 | 36     | H      | 3.64682  | 4.905614 | 7.129106 |
| 10     | C      | 1.006692 | 11.26966 | 1.692964 | 37     | C      | 3.562598 | 5.166813 | 4.043685 |
| 11     | C      | 0.510192 | 11.2839  | 2.992532 | 38     | H      | 4.567156 | 4.903052 | 4.3955   |
| 12     | C      | 0.242754 | 10.09002 | 3.693011 | 39     | H      | 3.410382 | 4.771891 | 3.034735 |
| 13     | O      | -0.44798 | 6.450053 | 5.571747 | 40     | H      | 3.47139  | 6.257074 | 4.005967 |
| 14     | C      | -0.2609  | 7.606607 | 5.047951 | 41     | C      | -2.6928  | 2.665916 | 3.414901 |
| 15     | C      | -0.53259 | 8.849211 | 5.742143 | 42     | H      | -3.72589 | 2.569257 | 3.060768 |
| 16     | C      | -1.0339  | 8.82966  | 7.05928  | 43     | H      | -2.00487 | 2.193548 | 2.709261 |
| 17     | C      | -1.29735 | 10.0158  | 7.72799  | 44     | H      | -2.57875 | 2.179318 | 4.386583 |
| 18     | C      | -1.06076 | 11.23927 | 7.08103  | 45     | C      | -3.55073 | 5.1256   | 4.686243 |
| 19     | C      | -0.5649  | 11.26809 | 5.781465 | 46     | H      | -4.55257 | 4.851555 | 4.334583 |
| 20     | C      | -0.2852  | 10.08216 | 5.072337 | 47     | H      | -3.39241 | 4.72798  | 5.693191 |
| 21     | H      | 1.187674 | 7.903198 | 1.217449 | 48     | H      | -3.4725  | 6.216697 | 4.728768 |
| 22     | H      | 1.642844 | 10.04692 | 0.022023 | 49     | C      | -2.61937 | 5.144392 | 1.920644 |
| 23     | H      | 1.201041 | 12.21084 | 1.185458 | 50     | H      | -2.52494 | 6.234789 | 1.942132 |
| 24     | H      | 0.331661 | 12.24413 | 3.463469 | 51     | H      | -1.89384 | 4.74838  | 1.20371  |
| 25     | H      | -1.68346 | 9.998004 | 8.743328 | 52     | H      | -3.63415 | 4.880094 | 1.599287 |
| 26     | H      | -0.39656 | 12.23348 | 5.317402 | 53     | Cl     | -0.60011 | 3.245034 | 6.124068 |
| 27     | H      | -1.2063  | 7.867774 | 7.53238  |        |        |          |          |          |

**Table S5** Optimized coordinates of open shell solutions of  $\mathbf{I}_{Me}^+$

| S. No. | Symbol | X        | Y        | Z        | S. No. | Symbol | X        | Y        | Z        |
|--------|--------|----------|----------|----------|--------|--------|----------|----------|----------|
| 1      | Ru     | -1.52843 | 0        | 0        | 28     | H      | 5.87353  | 0.616802 | 3.374068 |
| 2      | P      | -1.75314 | -2.41242 | 0.427145 | 29     | C      | -3.49631 | -2.97964 | 0.51127  |
| 3      | Cl     | -3.0134  | -0.31197 | -1.78196 | 30     | H      | -3.52992 | -4.05875 | 0.697969 |
| 4      | P      | -1.75314 | 2.412424 | -0.42715 | 31     | H      | -4.01421 | -2.45226 | 1.316597 |
| 5      | O      | 0.152197 | -0.2229  | -1.24477 | 32     | H      | -3.99964 | -2.75415 | -0.43233 |
| 6      | C      | 1.300551 | -0.13123 | -0.72969 | 33     | C      | -1.01359 | -2.97627 | 2.017075 |
| 7      | C      | 2.541461 | -0.26288 | -1.44958 | 34     | H      | 0.069174 | -2.81575 | 2.015711 |
| 8      | C      | 2.527989 | -0.51577 | -2.83704 | 35     | H      | -1.44964 | -2.40042 | 2.838907 |
| 9      | C      | 3.720809 | -0.64404 | -3.53398 | 36     | H      | -1.21201 | -4.04181 | 2.179486 |
| 10     | C      | 4.932368 | -0.51852 | -2.84065 | 37     | C      | -0.98581 | -3.48032 | -0.86257 |
| 11     | C      | 4.953119 | -0.26782 | -1.46671 | 38     | H      | -1.18373 | -4.53866 | -0.65836 |
| 12     | C      | 3.766276 | -0.13278 | -0.7302  | 39     | H      | -1.40379 | -3.21804 | -1.83913 |
| 13     | O      | 0.152197 | 0.222895 | 1.24477  | 40     | H      | 0.097247 | -3.32483 | -0.89478 |
| 14     | C      | 1.300551 | 0.13123  | 0.729685 | 41     | C      | -3.49631 | 2.979641 | -0.51127 |
| 15     | C      | 2.541461 | 0.262878 | 1.449575 | 42     | H      | -3.52992 | 4.058749 | -0.69797 |
| 16     | C      | 2.527989 | 0.515771 | 2.837041 | 43     | H      | -4.01421 | 2.452261 | -1.3166  |
| 17     | C      | 3.720809 | 0.644036 | 3.533981 | 44     | H      | -3.99964 | 2.754156 | 0.43233  |
| 18     | C      | 4.932368 | 0.518521 | 2.840647 | 45     | C      | -0.98581 | 3.480324 | 0.86257  |
| 19     | C      | 4.95312  | 0.267814 | 1.466713 | 46     | H      | -1.18372 | 4.538657 | 0.658362 |
| 20     | C      | 3.766276 | 0.132774 | 0.7302   | 47     | H      | -1.40379 | 3.218041 | 1.839127 |
| 21     | H      | 1.571989 | -0.60761 | -3.3432  | 48     | H      | 0.097248 | 3.324831 | 0.894781 |
| 22     | H      | 3.715841 | -0.83941 | -4.60171 | 49     | C      | -1.01359 | 2.976268 | -2.01708 |
| 23     | H      | 5.87353  | -0.6168  | -3.37407 | 50     | H      | 0.069178 | 2.815749 | -2.01571 |
| 24     | H      | 5.916748 | -0.17943 | -0.9794  | 51     | H      | -1.44964 | 2.400415 | -2.83891 |
| 25     | H      | 3.715842 | 0.839411 | 4.601708 | 52     | H      | -1.21201 | 4.041808 | -2.17949 |
| 26     | H      | 5.916748 | 0.179425 | 0.979404 | 53     | Cl     | -3.0134  | 0.311972 | 1.781958 |
| 27     | H      | 1.57199  | 0.607605 | 3.343199 |        |        |          |          |          |

**Table S6** Optimized coordinates of open shell solutions of  $1M_c$

| S. No. | Symbol | X        | Y        | Z        | S. No. | Symbol | X        | Y        | Z        |
|--------|--------|----------|----------|----------|--------|--------|----------|----------|----------|
| 1      | Ru     | 1.514092 | 0.002255 | -0.08666 | 28     | H      | -5.81657 | 3.443908 | 0.309434 |
| 2      | P      | 1.777976 | 0.079861 | -2.45495 | 29     | C      | 3.516788 | 0.069728 | -3.06671 |
| 3      | Cl     | 3.182876 | -1.85392 | -0.07512 | 30     | H      | 3.555345 | 0.114511 | -4.16306 |
| 4      | P      | 1.553129 | -0.07964 | 2.312373 | 31     | H      | 4.04015  | 0.926766 | -2.63292 |
| 5      | O      | -0.08838 | -1.32386 | -0.19069 | 32     | H      | 4.005018 | -0.84031 | -2.70614 |
| 6      | C      | -1.23554 | -0.70329 | -0.05422 | 33     | C      | 1.065153 | 1.57501  | -3.27785 |
| 7      | C      | -2.48345 | -1.43198 | 0.000134 | 34     | H      | -0.01191 | 1.620432 | -3.08792 |
| 8      | C      | -2.4756  | -2.84754 | -0.04251 | 35     | H      | 1.522829 | 2.461483 | -2.82739 |
| 9      | C      | -3.65613 | -3.56861 | 0.011424 | 36     | H      | 1.246961 | 1.572493 | -4.36058 |
| 10     | C      | -4.88652 | -2.88816 | 0.112424 | 37     | C      | 1.009411 | -1.3182  | -3.39192 |
| 11     | C      | -4.91115 | -1.50063 | 0.154375 | 38     | H      | 1.180764 | -1.23013 | -4.47283 |
| 12     | C      | -3.72592 | -0.73059 | 0.098379 | 39     | H      | 1.440566 | -2.25517 | -3.02496 |
| 13     | O      | -0.08585 | 1.333799 | -0.121   | 40     | H      | -0.06687 | -1.34427 | -3.1938  |
| 14     | C      | -1.23452 | 0.709048 | -0.0183  | 41     | C      | 3.23723  | -0.06483 | 3.060754 |
| 15     | C      | -2.48172 | 1.435708 | 0.068981 | 42     | H      | 3.189575 | -0.10801 | 4.156741 |
| 16     | C      | -2.47266 | 2.851693 | 0.092747 | 43     | H      | 3.794951 | -0.92148 | 2.670948 |
| 17     | C      | -3.65281 | 3.570607 | 0.176017 | 44     | H      | 3.750214 | 0.845783 | 2.737811 |
| 18     | C      | -4.88409 | 2.887434 | 0.241643 | 45     | C      | 0.708013 | 1.314043 | 3.188827 |
| 19     | C      | -4.90989 | 1.499478 | 0.220188 | 46     | H      | 0.802515 | 1.227778 | 4.279321 |
| 20     | C      | -3.72515 | 0.731729 | 0.132075 | 47     | H      | 1.159549 | 2.253027 | 2.852827 |
| 21     | H      | -1.51339 | -3.34491 | -0.11855 | 48     | H      | -0.35229 | 1.333865 | 2.917261 |
| 22     | H      | -3.63424 | -4.65598 | -0.02224 | 49     | C      | 0.785642 | -1.58386 | 3.066133 |
| 23     | H      | -5.81927 | -3.44644 | 0.158057 | 50     | H      | -0.27534 | -1.62934 | 2.801013 |
| 24     | H      | -5.87351 | -1.00349 | 0.231074 | 51     | H      | 1.27799  | -2.46346 | 2.63936  |
| 25     | H      | -3.62997 | 4.658352 | 0.19193  | 52     | H      | 0.889645 | -1.5932  | 4.159078 |
| 26     | H      | -5.87291 | 1.000243 | 0.27074  | 53     | Cl     | 3.187575 | 1.851016 | 0.027887 |
| 27     | H      | -1.50984 | 3.351212 | 0.043006 |        |        |          |          |          |

**Table S7** Optimized coordinates of **2**

| S. No. | Symbol | X       | Y       | Z       | S. No. | Symbol | X       | Y       | Z       |
|--------|--------|---------|---------|---------|--------|--------|---------|---------|---------|
| 1      | P      | 2.3587  | -0.8753 | -0.0979 | 33     | C      | 4.7768  | -3.6253 | -2.0653 |
| 2      | P      | -2.5535 | -1.0112 | 0.0503  | 34     | C      | 4.3368  | -4.8426 | -1.5412 |
| 3      | O      | -0.0732 | 0.7293  | 1.3366  | 35     | C      | 3.2909  | -4.8567 | -0.6138 |
| 4      | O      | -0.256  | 0.8255  | -1.1937 | 36     | C      | 2.6847  | -3.665  | -0.2131 |
| 5      | C      | 0.1571  | 1.8956  | 0.803   | 37     | C      | -3.3002 | 0.3488  | 1.0521  |
| 6      | C      | 0.0418  | 1.9528  | -0.6114 | 38     | C      | -4.1701 | 1.3041  | 0.5062  |
| 7      | C      | 0.0666  | 3.2161  | -1.3076 | 39     | C      | -4.6757 | 2.3386  | 1.3018  |
| 8      | C      | -0.1113 | 3.2695  | -2.706  | 40     | C      | -4.3236 | 2.425   | 2.6499  |
| 9      | C      | -0.093  | 4.4838  | -3.3734 | 41     | C      | -3.4537 | 1.4773  | 3.2011  |
| 10     | C      | 0.1173  | 5.6688  | -2.6485 | 42     | C      | -2.9367 | 0.453   | 2.4075  |
| 11     | C      | 0.299   | 5.6278  | -1.2711 | 43     | C      | -3.4412 | -0.9118 | -1.5706 |
| 12     | C      | 0.2758  | 4.4107  | -0.5578 | 44     | C      | -2.8491 | -0.2775 | -2.6733 |
| 13     | C      | 0.4379  | 4.3476  | 0.9038  | 45     | C      | -3.5418 | -0.1713 | -3.883  |
| 14     | C      | 0.6619  | 5.496   | 1.6923  | 46     | C      | -4.8282 | -0.7005 | -4.0098 |
| 15     | C      | 0.7837  | 5.4186  | 3.0747  | 47     | C      | -5.4227 | -1.34   | -2.918  |
| 16     | C      | 0.684   | 4.1793  | 3.7291  | 48     | C      | -4.7337 | -1.4469 | -1.7078 |
| 17     | C      | 0.4732  | 3.0296  | 2.9849  | 49     | C      | -3.2467 | -2.5582 | 0.784   |
| 18     | C      | 0.3532  | 3.0949  | 1.5807  | 50     | C      | -4.2758 | -2.5466 | 1.7369  |
| 19     | C      | 2.9765  | 0.4182  | -1.2595 | 51     | C      | -4.8089 | -3.7475 | 2.2179  |
| 20     | C      | 2.5884  | 0.3239  | -2.6091 | 52     | C      | -4.3233 | -4.9692 | 1.7477  |
| 21     | C      | 3.0185  | 1.2747  | -3.5341 | 53     | C      | -3.2987 | -4.9857 | 0.7957  |
| 22     | C      | 3.8228  | 2.3449  | -3.1243 | 54     | C      | -2.7584 | -3.7909 | 0.3191  |
| 23     | C      | 4.1897  | 2.4594  | -1.7827 | 55     | H      | -0.2565 | 2.3397  | -3.2457 |
| 24     | C      | 3.7695  | 1.5008  | -0.853  | 56     | H      | -0.2361 | 4.5185  | -4.4501 |
| 25     | C      | 3.3006  | -0.6038 | 1.4715  | 57     | H      | 0.137   | 6.6259  | -3.1633 |
| 26     | C      | 2.6381  | -0.2954 | 2.6677  | 58     | H      | 0.4521  | 6.5633  | -0.7444 |
| 27     | C      | 3.364   | -0.1152 | 3.8502  | 59     | H      | 0.7416  | 6.4703  | 1.2227  |
| 28     | C      | 4.7539  | -0.2415 | 3.8521  | 60     | H      | 0.9565  | 6.3253  | 3.6487  |
| 29     | C      | 5.4223  | -0.5586 | 2.6643  | 61     | H      | 0.7756  | 4.122   | 4.8104  |
| 30     | C      | 4.7006  | -0.7438 | 1.4847  | 62     | H      | 0.3999  | 2.0604  | 3.467   |
| 31     | C      | 3.1245  | -2.4371 | -0.7336 | 63     | H      | 1.9475  | -0.4937 | -2.9298 |
| 32     | C      | 4.1763  | -2.4281 | -1.6629 | 64     | H      | 2.7209  | 1.1829  | -4.5758 |

| S. No. | Symbol | X       | Y       | Z       | S. No. | Symbol | X       | Y       | Z       |
|--------|--------|---------|---------|---------|--------|--------|---------|---------|---------|
| 65     | H      | 4.1517  | 3.0882  | -3.8461 | 81     | H      | -3.1708 | 1.54    | 4.2489  |
| 66     | H      | 4.803   | 3.2938  | -1.452  | 82     | H      | -2.2476 | -0.2677 | 2.8389  |
| 67     | H      | 4.0677  | 1.6011  | 0.1858  | 83     | H      | -1.8469 | 0.1237  | -2.5907 |
| 68     | H      | 1.5582  | -0.2198 | 2.6803  | 84     | H      | -3.0668 | 0.3167  | -4.7306 |
| 69     | H      | 2.8356  | 0.113   | 4.7724  | 85     | H      | -5.3617 | -0.6225 | -4.954  |
| 70     | H      | 5.3146  | -0.1048 | 4.7735  | 86     | H      | -6.4207 | -1.762  | -3.007  |
| 71     | H      | 6.5038  | -0.6699 | 2.657   | 87     | H      | -5.2046 | -1.9549 | -0.872  |
| 72     | H      | 5.2306  | -1.0077 | 0.5741  | 88     | H      | -4.6697 | -1.607  | 2.1102  |
| 73     | H      | 4.5323  | -1.4937 | -2.0845 | 89     | H      | -5.6045 | -3.7219 | 2.9586  |
| 74     | H      | 5.5877  | -3.6007 | -2.7893 | 90     | H      | -4.7371 | -5.9023 | 2.1222  |
| 75     | H      | 4.8028  | -5.7734 | -1.8552 | 91     | H      | -2.9082 | -5.9318 | 0.4295  |
| 76     | H      | 2.9357  | -5.7989 | -0.2043 | 92     | H      | -1.9524 | -3.8139 | -0.4072 |
| 77     | H      | 1.8657  | -3.6908 | 0.498   | 93     | Os     | -0.1156 | -0.8175 | 0.0048  |
| 78     | H      | -4.4593 | 1.2452  | -0.5382 | 94     | Br     | -0.0096 | -2.579  | 1.8924  |
| 79     | H      | -5.3466 | 3.073   | 0.8632  | 95     | Br     | -0.1503 | -2.5314 | -1.9281 |
| 80     | H      | -4.7193 | 3.2271  | 3.2679  |        |        |         |         |         |

**Table S8** Optimized coordinates of close shell singlet solutions of  $2_{Me}$

| S. No. | Symbol | X        | Y        | Z        | S. No. | Symbol | X        | Y        | Z        |
|--------|--------|----------|----------|----------|--------|--------|----------|----------|----------|
| 1      | P      | -1.82682 | 2.518306 | -0.1436  | 28     | H      | -3.60684 | 4.190741 | -0.26695 |
| 2      | P      | -1.46628 | -2.29275 | 0.067075 | 29     | H      | -4.07716 | 2.646344 | -1.0458  |
| 3      | O      | 0.04069  | 0.301416 | 1.308464 | 30     | H      | -4.0827  | 2.773246 | 0.721511 |
| 4      | C      | 1.214778 | 0.043534 | 0.797901 | 31     | C      | -1.07724 | 3.30661  | -1.63295 |
| 5      | C      | 2.416994 | -0.02063 | 1.592514 | 32     | H      | 0.002315 | 3.128206 | -1.64756 |
| 6      | C      | 2.346503 | 0.049176 | 3.000728 | 33     | H      | -1.50979 | 2.84826  | -2.52742 |
| 7      | C      | 3.500087 | -0.01819 | 3.765738 | 34     | H      | -1.26637 | 4.386243 | -1.64738 |
| 8      | C      | 4.745452 | -0.16411 | 3.130607 | 35     | C      | -1.10073 | 3.459837 | 1.266936 |
| 9      | C      | 4.82582  | -0.23434 | 1.744794 | 36     | H      | -1.27852 | 4.53608  | 1.158234 |
| 10     | C      | 3.67414  | -0.16155 | 0.932508 | 37     | H      | -1.55439 | 3.108674 | 2.198866 |
| 11     | O      | 0.147301 | 0.222465 | -1.24061 | 38     | H      | -0.02327 | 3.276261 | 1.322727 |
| 12     | C      | 1.274115 | -0.00121 | -0.61879 | 39     | C      | -3.12175 | -3.0918  | 0.019886 |
| 13     | C      | 2.536862 | -0.11548 | -1.30607 | 40     | H      | -3.02215 | -4.18231 | 0.06505  |
| 14     | C      | 2.581711 | -0.14135 | -2.71683 | 41     | H      | -3.71478 | -2.73613 | 0.866832 |
| 15     | C      | 3.793653 | -0.25867 | -3.37856 | 42     | H      | -3.63147 | -2.80145 | -0.90276 |
| 16     | C      | 4.982049 | -0.36146 | -2.63503 | 43     | C      | -0.56348 | -3.11371 | -1.31744 |
| 17     | C      | 4.948555 | -0.33876 | -1.24568 | 44     | H      | -0.62902 | -4.20517 | -1.23781 |
| 18     | C      | 3.734794 | -0.21115 | -0.53718 | 45     | H      | -1.0078  | -2.78964 | -2.26366 |
| 19     | H      | 1.371333 | 0.155834 | 3.465791 | 46     | H      | 0.490511 | -2.81991 | -1.31383 |
| 20     | H      | 3.441639 | 0.038312 | 4.849301 | 47     | C      | -0.70369 | -2.99012 | 1.5953   |
| 21     | H      | 5.654757 | -0.22222 | 3.723035 | 48     | H      | 0.348106 | -2.69698 | 1.66445  |
| 22     | H      | 5.804828 | -0.34241 | 1.290813 | 49     | H      | -1.23246 | -2.58228 | 2.462256 |
| 23     | H      | 3.824362 | -0.27503 | -4.46462 | 50     | H      | -0.77065 | -4.08428 | 1.606506 |
| 24     | H      | 5.886424 | -0.41804 | -0.70694 | 51     | Os     | -1.49058 | 0.138322 | -0.02925 |
| 25     | H      | 1.647967 | -0.06852 | -3.26588 | 52     | Br     | -3.24369 | 0.10711  | 1.839175 |
| 26     | H      | 5.936342 | -0.4596  | -3.1458  | 53     | Br     | -3.09545 | -0.03142 | -2.02016 |
| 27     | C      | -3.57142 | 3.098003 | -0.18836 |        |        |          |          |          |

**Table S9** Optimized coordinates of open shell solutions of  $2M_c$

| S. No. | Symbol | X        | Y        | Z        | S. No. | Symbol | X        | Y        | Z        |
|--------|--------|----------|----------|----------|--------|--------|----------|----------|----------|
| 1      | P      | -1.82682 | 2.518306 | -0.1436  | 28     | H      | -3.60684 | 4.190741 | -0.26695 |
| 2      | P      | -1.46628 | -2.29275 | 0.067075 | 29     | H      | -4.07716 | 2.646344 | -1.0458  |
| 3      | O      | 0.04069  | 0.301416 | 1.308464 | 30     | H      | -4.0827  | 2.773247 | 0.721511 |
| 4      | C      | 1.214778 | 0.043534 | 0.797901 | 31     | C      | -1.07724 | 3.30661  | -1.63295 |
| 5      | C      | 2.416994 | -0.02063 | 1.592514 | 32     | H      | 0.002315 | 3.128207 | -1.64756 |
| 6      | C      | 2.346503 | 0.049176 | 3.000728 | 33     | H      | -1.50979 | 2.848261 | -2.52742 |
| 7      | C      | 3.500088 | -0.01819 | 3.765738 | 34     | H      | -1.26637 | 4.386244 | -1.64738 |
| 8      | C      | 4.745453 | -0.16411 | 3.130608 | 35     | C      | -1.10073 | 3.459837 | 1.266936 |
| 9      | C      | 4.82582  | -0.23434 | 1.744794 | 36     | H      | -1.27852 | 4.53608  | 1.158234 |
| 10     | C      | 3.67414  | -0.16155 | 0.932508 | 37     | H      | -1.55439 | 3.108674 | 2.198866 |
| 11     | O      | 0.147301 | 0.222465 | -1.24061 | 38     | H      | -0.02327 | 3.276261 | 1.322727 |
| 12     | C      | 1.274115 | -0.00121 | -0.61879 | 39     | C      | -3.12175 | -3.0918  | 0.019886 |
| 13     | C      | 2.536862 | -0.11548 | -1.30607 | 40     | H      | -3.02215 | -4.18232 | 0.06505  |
| 14     | C      | 2.581711 | -0.14135 | -2.71683 | 41     | H      | -3.71478 | -2.73614 | 0.866832 |
| 15     | C      | 3.793653 | -0.25867 | -3.37856 | 42     | H      | -3.63147 | -2.80145 | -0.90276 |
| 16     | C      | 4.98205  | -0.36146 | -2.63503 | 43     | C      | -0.56348 | -3.11371 | -1.31744 |
| 17     | C      | 4.948555 | -0.33876 | -1.24568 | 44     | H      | -0.62902 | -4.20517 | -1.23781 |
| 18     | C      | 3.734794 | -0.21115 | -0.53718 | 45     | H      | -1.0078  | -2.78964 | -2.26366 |
| 19     | H      | 1.371333 | 0.155834 | 3.465791 | 46     | H      | 0.490511 | -2.81991 | -1.31383 |
| 20     | H      | 3.44164  | 0.038312 | 4.849301 | 47     | C      | -0.70369 | -2.99012 | 1.5953   |
| 21     | H      | 5.654757 | -0.22222 | 3.723036 | 48     | H      | 0.348106 | -2.69698 | 1.66445  |
| 22     | H      | 5.804829 | -0.34241 | 1.290813 | 49     | H      | -1.23246 | -2.58228 | 2.462256 |
| 23     | H      | 3.824362 | -0.27503 | -4.46462 | 50     | H      | -0.77065 | -4.08428 | 1.606506 |
| 24     | H      | 5.886425 | -0.41804 | -0.70694 | 51     | Os     | -1.49058 | 0.138322 | -0.02925 |
| 25     | H      | 1.647967 | -0.06852 | -3.26588 | 52     | Br     | -3.24369 | 0.10711  | 1.839176 |
| 26     | H      | 5.936342 | -0.4596  | -3.1458  | 53     | Br     | -3.09545 | -0.03142 | -2.02016 |
| 27     | C      | -3.57142 | 3.098003 | -0.18836 |        |        |          |          |          |

**Table S10** Optimized coordinates of  $3M_c$

| S. No. | Symbol | X        | Y        | Z        | S. No. | Symbol | X        | Y        | Z        |
|--------|--------|----------|----------|----------|--------|--------|----------|----------|----------|
| 1      | Cl     | 0.375581 | 3.029006 | 2.715632 | 28     | H      | -4.16464 | 3.025497 | 2.720084 |
| 2      | P      | -2.38061 | 4.583777 | 3.331539 | 29     | H      | -2.57146 | 2.223635 | 2.821924 |
| 3      | O      | 0.039489 | 6.429267 | 2.975572 | 30     | H      | -3.47902 | 2.607685 | 4.306806 |
| 4      | C      | -0.0221  | 7.519486 | 3.657637 | 31     | C      | -3.63768 | 5.727797 | 4.046476 |
| 5      | C      | 0.311476 | 8.800383 | 3.056828 | 32     | H      | -4.59332 | 5.628219 | 3.518495 |
| 6      | C      | 0.778985 | 8.837869 | 1.726638 | 33     | H      | -3.78742 | 5.515164 | 5.108914 |
| 7      | C      | 1.10105  | 10.04515 | 1.125452 | 34     | H      | -3.28765 | 6.760263 | 3.956948 |
| 8      | C      | 0.961337 | 11.23841 | 1.853041 | 35     | C      | -2.326   | 5.041361 | 1.55319  |
| 9      | C      | 0.508884 | 11.21223 | 3.167762 | 36     | H      | -1.90063 | 6.04186  | 1.447336 |
| 10     | C      | 0.173964 | 10.00127 | 3.808065 | 37     | H      | -1.67083 | 4.337502 | 1.032932 |
| 11     | O      | -0.76273 | 6.313188 | 5.544123 | 38     | H      | -3.3332  | 5.010676 | 1.121493 |
| 12     | C      | -0.45758 | 7.465646 | 5.027327 | 39     | Rh     | -0.23514 | 4.73882  | 4.28339  |
| 13     | C      | -0.59504 | 8.684264 | 5.798462 | 40     | Cl     | 2.078334 | 5.09038  | 4.950634 |
| 14     | C      | -1.02657 | 8.620191 | 7.141516 | 41     | P      | -0.48162 | 3.192294 | 5.986484 |
| 15     | C      | -1.17302 | 9.773411 | 7.89624  | 42     | C      | 0.841748 | 3.219608 | 7.259454 |
| 16     | C      | -0.88679 | 11.02002 | 7.31539  | 43     | H      | 0.573717 | 2.530868 | 8.070126 |
| 17     | C      | -0.45481 | 11.09675 | 5.995842 | 44     | H      | 1.791868 | 2.926526 | 6.809045 |
| 18     | C      | -0.29375 | 9.943271 | 5.201414 | 45     | H      | 0.9608   | 4.233324 | 7.648809 |
| 19     | H      | 0.89145  | 7.897917 | 1.19617  | 46     | C      | -0.59724 | 1.410235 | 5.547848 |
| 20     | H      | 1.466014 | 10.06685 | 0.102138 | 47     | H      | 0.310128 | 1.119377 | 5.012601 |
| 21     | H      | 1.21376  | 12.19023 | 1.392757 | 48     | H      | -0.70066 | 0.812269 | 6.460886 |
| 22     | H      | 0.422683 | 12.15254 | 3.701346 | 49     | H      | -1.4481  | 1.219753 | 4.889766 |
| 23     | H      | -1.5025  | 9.713684 | 8.930181 | 50     | C      | -1.99276 | 3.528085 | 6.992493 |
| 24     | H      | -0.23838 | 12.07532 | 5.581523 | 51     | H      | -2.90267 | 3.342566 | 6.414574 |
| 25     | H      | -1.23319 | 7.644878 | 7.569262 | 52     | H      | -2.00904 | 2.89068  | 7.884032 |
| 26     | H      | -0.9971  | 11.93135 | 7.897372 | 53     | H      | -1.98299 | 4.578359 | 7.298539 |
| 27     | C      | -3.2357  | 2.950933 | 3.297148 |        |        |          |          |          |

**Table S11** Optimized coordinates of  $3_{Me}^+$

| S. No. | Symbol | X        | Y        | Z        | S. No. | Symbol | X        | Y        | Z        |
|--------|--------|----------|----------|----------|--------|--------|----------|----------|----------|
| 1      | Cl     | 0.356184 | 3.209539 | 2.739346 | 28     | H      | -4.1399  | 2.597943 | 2.680346 |
| 2      | P      | -2.59116 | 4.366591 | 3.309104 | 29     | H      | -2.46914 | 1.991327 | 2.812522 |
| 3      | O      | -0.33027 | 6.610798 | 2.886688 | 30     | H      | -3.44548 | 2.273407 | 4.279843 |
| 4      | C      | -0.17423 | 7.638841 | 3.571759 | 31     | C      | -3.96084 | 5.340426 | 4.063715 |
| 5      | C      | 0.340466 | 8.887211 | 3.046539 | 32     | H      | -4.89966 | 5.150232 | 3.531319 |
| 6      | C      | 0.842475 | 8.911769 | 1.731145 | 33     | H      | -4.09029 | 5.074943 | 5.116994 |
| 7      | C      | 1.356864 | 10.0882  | 1.20031  | 34     | H      | -3.73338 | 6.408823 | 4.006263 |
| 8      | C      | 1.370948 | 11.2414  | 1.992417 | 35     | C      | -2.59574 | 4.856542 | 1.539811 |
| 9      | C      | 0.87728  | 11.22235 | 3.300643 | 36     | H      | -2.34317 | 5.914873 | 1.442009 |
| 10     | C      | 0.351    | 10.0515  | 3.86293  | 37     | H      | -1.84274 | 4.271186 | 1.005488 |
| 11     | O      | -1.09276 | 6.484223 | 5.434115 | 38     | H      | -3.5852  | 4.674151 | 1.105892 |
| 12     | C      | -0.64552 | 7.580837 | 5.020972 | 39     | Rh     | -0.4598  | 4.827824 | 4.23595  |
| 13     | C      | -0.66184 | 8.791853 | 5.810372 | 40     | Cl     | 1.77091  | 5.566439 | 4.86761  |
| 14     | C      | -1.14869 | 8.744111 | 7.133325 | 41     | P      | -0.49506 | 3.280751 | 5.948799 |
| 15     | C      | -1.17029 | 9.887873 | 7.917547 | 42     | C      | 0.873924 | 3.4734   | 7.151478 |
| 16     | C      | -0.69712 | 11.08995 | 7.376005 | 43     | H      | 0.725597 | 2.75287  | 7.964723 |
| 17     | C      | -0.20833 | 11.14631 | 6.068817 | 44     | H      | 1.831293 | 3.289804 | 6.659683 |
| 18     | C      | -0.1742  | 10.00804 | 5.250405 | 45     | H      | 0.89055  | 4.489566 | 7.550944 |
| 19     | H      | 0.832236 | 7.993402 | 1.153225 | 46     | C      | -0.43861 | 1.503846 | 5.502318 |
| 20     | H      | 1.749864 | 10.10952 | 0.188749 | 47     | H      | 0.496836 | 1.29325  | 4.978927 |
| 21     | H      | 1.774515 | 12.16791 | 1.593851 | 48     | H      | -0.49135 | 0.908568 | 6.421136 |
| 22     | H      | 0.918081 | 12.14108 | 3.873299 | 49     | H      | -1.26517 | 1.22966  | 4.844626 |
| 23     | H      | -1.54471 | 9.852207 | 8.935762 | 50     | C      | -2.00674 | 3.484584 | 6.979603 |
| 24     | H      | 0.146362 | 12.10065 | 5.698929 | 51     | H      | -2.9065  | 3.213841 | 6.421053 |
| 25     | H      | -1.50136 | 7.795713 | 7.524322 | 52     | H      | -1.93897 | 2.840452 | 7.863574 |
| 26     | H      | -0.70544 | 11.99504 | 7.976766 | 53     | H      | -2.09269 | 4.525745 | 7.303658 |
| 27     | C      | -3.2197  | 2.638754 | 3.274051 |        |        |          |          |          |

**Table S12** Optimized coordinates of  $3_{Me}^-$

| S. No. | Symbol | X        | Y        | Z        | S. No. | Symbol | X        | Y        | Z        |
|--------|--------|----------|----------|----------|--------|--------|----------|----------|----------|
| 1      | Cl     | 0.371797 | 2.920289 | 2.646794 | 28     | H      | -4.19628 | 3.273628 | 2.776385 |
| 2      | P      | -2.26343 | 4.693778 | 3.314812 | 29     | H      | -2.67334 | 2.341776 | 2.88952  |
| 3      | O      | 0.139799 | 6.341617 | 2.971748 | 30     | H      | -3.52201 | 2.854283 | 4.370094 |
| 4      | C      | 0.003855 | 7.460464 | 3.685927 | 31     | C      | -3.41414 | 5.96517  | 3.989236 |
| 5      | C      | 0.271304 | 8.738929 | 3.076867 | 32     | H      | -4.37394 | 5.946439 | 3.457793 |
| 6      | C      | 0.730149 | 8.795208 | 1.734711 | 33     | H      | -3.5773  | 5.794674 | 5.057298 |
| 7      | C      | 0.987518 | 10.00511 | 1.116905 | 34     | H      | -2.95181 | 6.950756 | 3.880694 |
| 8      | C      | 0.796062 | 11.21101 | 1.827218 | 35     | C      | -2.20022 | 5.067591 | 1.51708  |
| 9      | C      | 0.35742  | 11.17596 | 3.142118 | 36     | H      | -1.65204 | 6.002681 | 1.381569 |
| 10     | C      | 0.084826 | 9.956531 | 3.809817 | 37     | H      | -1.63972 | 4.27107  | 1.020114 |
| 11     | O      | -0.66977 | 6.20236  | 5.575028 | 38     | H      | -3.21294 | 5.142468 | 1.101217 |
| 12     | C      | -0.41186 | 7.400414 | 5.013841 | 39     | Rh     | -0.14533 | 4.714709 | 4.265494 |
| 13     | C      | -0.60122 | 8.598484 | 5.778554 | 40     | Cl     | 2.216519 | 4.93946  | 4.951182 |
| 14     | C      | -1.02821 | 8.524608 | 7.132681 | 41     | P      | -0.4562  | 3.182333 | 5.991662 |
| 15     | C      | -1.23158 | 9.666162 | 7.885555 | 42     | C      | 0.867402 | 3.136053 | 7.270313 |
| 16     | C      | -1.01282 | 10.93723 | 7.309663 | 43     | H      | 0.567274 | 2.472752 | 8.092466 |
| 17     | C      | -0.58778 | 11.03115 | 5.992363 | 44     | H      | 1.799788 | 2.792301 | 6.817846 |
| 18     | C      | -0.3661  | 9.886776 | 5.189519 | 45     | H      | 1.041696 | 4.149455 | 7.640225 |
| 19     | H      | 0.886751 | 7.853356 | 1.218045 | 46     | C      | -0.68101 | 1.391768 | 5.601163 |
| 20     | H      | 1.345956 | 10.02848 | 0.089265 | 47     | H      | 0.181507 | 1.051527 | 5.021622 |
| 21     | H      | 0.999691 | 12.16746 | 1.349338 | 48     | H      | -0.77167 | 0.804635 | 6.523776 |
| 22     | H      | 0.227915 | 12.11695 | 3.669479 | 49     | H      | -1.57164 | 1.240744 | 4.985088 |
| 23     | H      | -1.55501 | 9.586123 | 8.922236 | 50     | C      | -1.93438 | 3.593854 | 7.026569 |
| 24     | H      | -0.4209  | 12.01925 | 5.572755 | 51     | H      | -2.8609  | 3.437029 | 6.465163 |
| 25     | H      | -1.18162 | 7.539262 | 7.561403 | 52     | H      | -1.96606 | 2.981943 | 7.936662 |
| 26     | H      | -1.16997 | 11.84058 | 7.895805 | 53     | H      | -1.86937 | 4.653396 | 7.292235 |
| 27     | C      | -3.26732 | 3.140107 | 3.344761 |        |        |          |          |          |



**Table S13** Optimized coordinates of  $4_{Me}^+$

| S. No. | Symbol | X        | Y        | Z        | S. No. | Symbol | X        | Y        | Z        |
|--------|--------|----------|----------|----------|--------|--------|----------|----------|----------|
| 1      | P      | -1.72409 | 2.432193 | -0.06983 | 28     | H      | 5.864214 | -0.16858 | -3.39362 |
| 2      | P      | -1.7304  | -2.43326 | 0.184704 | 29     | C      | -3.3881  | 3.085998 | -0.48353 |
| 3      | O      | -3.49613 | -0.1311  | -2.45885 | 30     | H      | -3.40939 | 4.178811 | -0.38514 |
| 4      | C      | -2.77981 | -0.08321 | -1.54618 | 31     | H      | -3.65211 | 2.812671 | -1.51256 |
| 5      | O      | 0.098606 | 0.046943 | 1.263092 | 32     | H      | -4.12279 | 2.640856 | 0.197091 |
| 6      | C      | 1.250951 | 0.029375 | 0.731107 | 33     | C      | -0.58552 | 3.294561 | -1.23623 |
| 7      | C      | 2.488039 | 0.073546 | 1.46944  | 34     | H      | 0.457088 | 3.032538 | -1.01811 |
| 8      | C      | 2.462248 | 0.148253 | 2.877096 | 35     | H      | -0.81237 | 2.988515 | -2.26469 |
| 9      | C      | 3.646358 | 0.195851 | 3.594842 | 36     | H      | -0.69794 | 4.383304 | -1.15288 |
| 10     | C      | 4.864795 | 0.169037 | 2.902946 | 37     | C      | -1.32846 | 3.137308 | 1.580315 |
| 11     | C      | 4.899583 | 0.095304 | 1.511453 | 38     | H      | -1.43968 | 4.229233 | 1.571375 |
| 12     | C      | 3.719983 | 0.045537 | 0.751956 | 39     | H      | -2.00867 | 2.702023 | 2.320993 |
| 13     | O      | 0.120142 | -0.06585 | -1.28844 | 40     | H      | -0.29986 | 2.880419 | 1.860193 |
| 14     | C      | 1.270956 | -0.03801 | -0.732   | 41     | C      | -3.38932 | -3.13178 | -0.17304 |
| 15     | C      | 2.512534 | -0.07214 | -1.46071 | 42     | H      | -3.41281 | -4.20573 | 0.05223  |
| 16     | C      | 2.512858 | -0.14574 | -2.86815 | 43     | H      | -4.1326  | -2.61115 | 0.441579 |
| 17     | C      | 3.710304 | -0.18025 | -3.56549 | 44     | H      | -3.64002 | -2.98079 | -1.23025 |
| 18     | C      | 4.917647 | -0.14151 | -2.85612 | 45     | C      | -0.57449 | -3.41094 | -0.86803 |
| 19     | C      | 4.926579 | -0.06878 | -1.46438 | 46     | H      | -0.6777  | -4.48453 | -0.66327 |
| 20     | C      | 3.733281 | -0.03206 | -0.7259  | 47     | H      | -0.79122 | -3.22466 | -1.92687 |
| 21     | H      | 1.49757  | 0.16865  | 3.380723 | 48     | H      | 0.462667 | -3.11406 | -0.66876 |
| 22     | H      | 3.631355 | 0.254111 | 4.68135  | 49     | C      | -1.34795 | -2.96134 | 1.902616 |
| 23     | H      | 5.802375 | 0.20672  | 3.45566  | 50     | H      | -0.32369 | -2.66896 | 2.162473 |
| 24     | H      | 5.869641 | 0.078052 | 1.022502 | 51     | H      | -2.03739 | -2.45932 | 2.590461 |
| 25     | H      | 3.712341 | -0.23741 | -4.65224 | 52     | H      | -1.45152 | -4.04942 | 2.002377 |
| 26     | H      | 5.887359 | -0.04152 | -0.95778 | 53     | Os     | -1.57579 | -0.01159 | -0.13707 |
| 27     | H      | 1.559468 | -0.17547 | -3.39206 | 54     | Br     | -3.39356 | 0.08614  | 1.671973 |
